# Supplementary material for: Rates and spectra of de novo structural mutations in Chlamydomonas reinhardtii
Source: HighWire-hosted journal article supplement (doi:10.1101/gr.276957.122), 2022-12-12
Supplement: Supplemental_Dataset_S1.xlsx [file Supplemental_Dataset_S1.xlsx]

## Sheet: Sheet1
Supplemental Dataset S1. Genomic coordinates of structural mutations found in MA lines of two strains of C. reinhardtii. The type of the mutation is included, as well as its annotation for mobile elements, and for tandem repeat mutations (where TRF indicates annotation made by Tandem Repeats Finder).
CHROMOSOME	START	END	STRAIN	LINE	TYPE	MOBILE ANNOTATION	TANDEM REPEAT ANNOTATION
1	1067550	1068595	CC-1952	L1	Duplication
1	1067550	1068595	CC-1952	L1	Insertion Mobile	Dualen-4b_cRei
1	1135733	1135733	CC-1952	L1	Expansion		centromeric
1	1724683	1724684	CC-1952	L6	Expansion		satellite (TRF)
1	1725732	1726784	CC-1952	L3	Contraction		satellite (TRF)
1	2463930	2464226	CC-1952	L3	Insertion Mobile	Dualen-4b_cRei
1	2463930	2464226	CC-1952	L3	Duplication
1	4419889	4420089	CC-1952	L3	Contraction		satellite (TRF)
1	4513998	4514286	CC-1952	L6	Contraction		satellite (TRF)
1	4541862	4542128	CC-1952	L6	Contraction		satellite (TRF)
1	7002337	7002338	CC-1952	L15	Expansion		Satellite (MSAT-1D_CR)
1	7022035	7022036	CC-1952	L15	Expansion		Satellite (MSAT-1D_CR)
1	7563718	7563872	CC-1952	L6	Deletion
1	8250125	8253836	CC-1952	L1	Contraction		satellite (TRF)
2	203170	203171	CC-1952	L6	Expansion		satellite (TRF)
2	1188273	1236082	CC-1952	L6	Duplication
2	1975724	1976051	CC-1952	L15	Contraction		microsatellite
2	1975724	1976051	CC-1952	L3	Contraction		microsatellite
2	3291842	3291903	CC-1952	L6	Contraction		microsatellite
3	5317916	5317916	CC-1952	L15	Expansion		satellite (TRF)
3	5324899	5324900	CC-1952	L6	Expansion		satellite (TRF)
4	16441	16442	CC-1952	L3	Expansion		satellite (TRF)
4	790903	792980	CC-1952	L15	Contraction		centromeric
4	2440119	2440121	CC-1952	L1	Expansion		microsatellite
5	1935931	1936122	CC-1952	L1	Contraction		satellite (TRF)
5	1999937	1999938	CC-1952	L3	Expansion		satellite (TRF)
6	491681	491681	CC-1952	L1	Expansion		satellite (TRF)
6	1249439	1249440	CC-1952	L15	Insertion Mobile	Dualen-4b_cRei
6	1249439	1249887	CC-1952	L15	Duplication
6	3962299	3962302	CC-1952	L15	Expansion		satellite (TRF)
6	5734912	5734913	CC-1952	L6	Insertion Mobile	Dualen-4b_cRei
6	5734912	5736419	CC-1952	L6	Duplication
6	5959225	5959225	CC-1952	L15	Expansion		genic
6	5996866	5996878	CC-1952	L3	Insertion Mobile	Dualen-4b_cRei
6	6559507	6559518	CC-1952	L15	Insertion Mobile	Dualen-4b_cRei
6	7477481	7509167	CC-1952	L3	Excision Mobile	Zisupton-3_cRei
7	3247745	3247745	CC-1952	L15	Expansion		satellite TRF
8	1893547	1894672	CC-1952	L1	Contraction		satellite TRF
8	2886759	2886761	CC-1952	L1	Insertion Mobile	Dualen-4b_cRei
8	3562539	3562825	CC-1952	L6	Contraction		microsatellite
8	3985876	3985876	CC-1952	L6	Expansion		satellite TRF
9	1499062	1499063	CC-1952	L3	Expansion		satellite (MSAT-4A_CR)
9	1588072	1588081	CC-1952	L15	Insertion Mobile	Dualen-4b_cRei
9	4943614	4943627	CC-1952	L15	Insertion Mobile	Dualen-4b_cRei
9	5660177	5660178	CC-1952	L15	Insertion Mobile	Dualen-4b_cRei
9	5660177	5661094	CC-1952	L15	Duplication
9	5739820	5739821	CC-1952	L1	Contraction		microsatellite
10	6017611	6029356	CC-1952	L1	Expansion		satellite (manual)
11	290362	290362	CC-1952	L6	Expansion		satellite (TRF)
11	2135638	2135720	CC-1952	L15	Expansion		satellite (TRF)
11	2222545	2222571	CC-1952	L1	Expansion		microsatellite
11	2592012	2592013	CC-1952	L15	Expansion		microsatellite
11	2754214	2755393	CC-1952	L6	Contraction		satellite (MSAT-4A_CR)
11	2807951	2807956	CC-1952	L1	Expansion		satellite (TRF)
11	3003981	3003981	CC-1952	L6	Expansion		satellite (TRF)
11	3073103	3073104	CC-1952	L1	Expansion		satellite (TRF)
11	3089797	3091430	CC-1952	L6	Contraction		satellite (TRF)
11	3298490	3298493	CC-1952	L1	Expansion		satellite (TRF)
11	3389881	3389882	CC-1952	L3	Expansion		satellite (TRF)
11	3391848	3391848	CC-1952	L6	Expansion		satellite (TRF)
11	3505947	3506127	CC-1952	L15	Contraction		satellite (TRF)
11	3515460	3516199	CC-1952	L6	Duplication
11	5016865	5111318	CC-1952	L15	Deletion
12	1350205	1350206	CC-1952	L15	Expansion		satellite (MSAT-4A_CR)
12	1791487	1796740	CC-1952	L1	Inversion
12	2532020	2540879	CC-1952	L1	Excision Mobile	P-2_cRei
12	3173598	3173598	CC-1952	L1	Insertion Mobile	P-2_cRei
12	4006318	4007513	CC-1952	L6	Contraction		satellite (MSAT-4B_CR)
12	6743372	6744095	CC-1952	L6	Contraction		satellite (TRF)
12	6787304	6787309	CC-1952	L3	Insertion Mobile	Dualen-4b_cRei
12	6875160	6875344	CC-1952	L3	Contraction		satellite (TRF)
12	6926636	6931631	CC-1952	L15	Contraction		centromeric
12	6965699	6965710	CC-1952	L3	Insertion Mobile	Dualen-4b_cRei
12	7005363	7005364	CC-1952	L15	Insertion Mobile	Dualen-4b_cRei
12	7005363	7006375	CC-1952	L15	Duplication
12	7088124	7088124	CC-1952	L6	Expansion		satellite (TRF)
12	7904362	7904465	CC-1952	L6	Contraction		microsatellite
12	8854219	8854539	CC-1952	L3	Contraction		satellite (TRF)
13	1386498	1386514	CC-1952	L6	Insertion Mobile	Dualen-4b_cRei
13	2316337	2316338	CC-1952	L1	Insertion Mobile	Dualen-4b_cRei
13	2316337	2317812	CC-1952	L1	Duplication
14	693567	693567	CC-1952	L15	Expansion		satellite (TRF)
14	2304112	2304113	CC-1952	L15	Insertion Mobile	Dualen-4b_cRei
14	2304112	2304485	CC-1952	L15	Duplication
14	3957061	3957062	CC-1952	L3	Insertion Mobile	Dualen-4b_cRei
14	3957061	3959860	CC-1952	L3	Deletion
14	3959973	3960275	CC-1952	L3	Duplication
14	4179989	4182476	CC-1952	L6	Contraction		genic
15	237407	237598	CC-1952	L15	Contraction		satellite (TRF)
15	300174	300175	CC-1952	L15	Expansion		satellite (TRF)
15	320551	320552	CC-1952	L6	Expansion		satellite (TRF)
15	337439	339095	CC-1952	L3	Contraction		satellite (TRF)
15	340299	340300	CC-1952	L6	Insertion Mobile	Dualen-4b_cRei
15	369612	369613	CC-1952	L1	Expansion		satellite (TRF)
15	369612	369613	CC-1952	L3	Expansion		satellite (TRF)
15	377173	377537	CC-1952	L1	Contraction		satellite (TRF)
15	378560	379485	CC-1952	L1	Contraction		satellite (TRF)
15	1233518	1233519	CC-1952	L15	Expansion		NCL gene family
15	1666968	1666969	CC-1952	L1	Insertion Mobile	Dualen-4b_cRei
15	1666968	1667636	CC-1952	L1	Duplication
15	2115442	2115496	CC-1952	L1	Contraction		microsatellite
15	2776552	2776563	CC-1952	L6	Insertion Mobile	Dualen-4b_cRei
15	3434930	3435338	CC-1952	L3	Contraction		satellite (TRF)
15	3524659	3524659	CC-1952	L15	Expansion		satellite (TRF)
16	627098	627099	CC-1952	L6	Insertion Mobile	Dualen-4b_cRei
16	627098	627622	CC-1952	L6	Duplication
16	3403697	3403918	CC-1952	L3	Contraction		satellite (MSAT-7_cRei)
16	3587347	3587348	CC-1952	L1	Expansion		centromeric
16	3616243	3616348	CC-1952	L1	Contraction		centromeric
16	3708645	3708645	CC-1952	L1	Expansion		satellite (TRF)
16	3721421	3721430	CC-1952	L3	Insertion Mobile	Dualen-4b_cRei
16	4227501	4229704	CC-1952	L15	Contraction		genic
16	4536751	4536752	CC-1952	L6	Insertion Mobile	Dualen-4b_cRei
16	5088277	5089585	CC-1952	L15	Duplication
16	5088277	5089585	CC-1952	L15	Insertion Mobile	Dualen-4b_cRei
17	992092	992093	CC-1952	L1	Expansion		satellite (TRF)
17	2292506	2292507	CC-1952	L15	Expansion		satellite (MSAT-4B_CR)
17	5832983	5832984	CC-1952	L15	Expansion		satellite (TRF)
17	6229996	6231127	CC-1952	L15	Duplication
17	6229996	6231127	CC-1952	L15	Insertion Mobile	Dualen-4b_cRei
1	717531	717664	CC-2931	L6	Contraction		microsatellite
1	975229	975230	CC-2931	L6	Insertion Mobile	CryptonF-1_cRei
1	1031389	1043071	CC-2931	L9	Expansion		centromeric
1	1480313	1480314	CC-2931	L2	Insertion Mobile	CryptonF-1_cRei
1	1487618	1493197	CC-2931	L1	Excision Mobile	EnSpm-N3_cRei
1	1487618	1493197	CC-2931	L14	Excision Mobile	EnSpm-N3_cRei
1	1487618	1493197	CC-2931	L15	Excision Mobile	EnSpm-N3_cRei
1	1487618	1493197	CC-2931	L6	Excision Mobile	EnSpm-N3_cRei
1	1933754	1973125	CC-2931	L2	Duplication
1	1994287	chromosome_11:1703743	CC-2931	L15	Translocation
1	2256369	2256428	CC-2931	L15	Contraction		satellite (manual)
1	2725584	2726768	CC-2931	L9	Expansion		satellite (MSAT-4B_CR)
1	2998796	2998976	CC-2931	L1	Contraction		microsatellite
1	3136752	3136822	CC-2931	L13	Contraction		microsatellite
1	3253330	3338607	CC-2931	L14	Inversion
1	3296263	3296264	CC-2931	L13	Insertion Mobile	unknown-12_cRei
1	3338611	3338612	CC-2931	L14	Insertion Mobile	CryptonF-1_cRei
2	30138	30139	CC-2931	L11	Expansion		microsatellite
2	243871	244172	CC-2931	L15	Contraction		microsatellite
2	301292	301293	CC-2931	L11	Insertion Mobile	CryptonF-1_cRei
2	305059	305060	CC-2931	L13	Insertion Mobile	CryptonF-1_cRei
2	305059	chromosome_02:5334791	CC-2931	L13	Translocation
2	452583	452585	CC-2931	L2	Insertion Mobile	CryptonF-1_cRei
2	527390	527391	CC-2931	L13	Insertion Mobile	unknown-3_cRei
2	527390	527391	CC-2931	L13	Insertion Mobile	unknown-3_cRei
2	527390	527391	CC-2931	L13	Insertion Mobile	unknown-3_cRei
2	527390	6476268	CC-2931	L13	Inversion
2	865752	879835	CC-2931	L2	Expansion		satellite (manual)
2	874054	874054	CC-2931	L9	Expansion		satellite (TRF)
2	876819	chromosome_07:2033321,chromosome_16:5150305	CC-2931	L1	Translocation
2	885289	885290	CC-2931	L2	Expansion		satellite (TRF)
2	1058784	1058785	CC-2931	L13	Expansion		satellite (MSAT-1E_CR)
2	1143824	1143884	CC-2931	L1	Contraction		microsatellite
2	1270518	1270522	CC-2931	L14	Insertion Mobile	CryptonF-1_cRei
2	2523407	2525500	CC-2931	L9	Contraction		satellite (manual)
2	2801583	2801585	CC-2931	L11	Insertion Mobile	EnSpm-N3_cRei
2	4476909	4476910	CC-2931	L6	Insertion Mobile	CryptonF-1_cRei
2	5050531	5061868	CC-2931	L13	Duplication
2	5765758	5786082	CC-2931	L15	Duplication
2	5962130	5962131	CC-2931	L13	Insertion Mobile	CryptonF-1_cRei
2	5962130	6014808	CC-2931	L13	Translocation
2	6014806	6014809	CC-2931	L2	Insertion Mobile	CryptonF-1_cRei
2	6057502	6057503	CC-2931	L15	Insertion Mobile	Helitron2-N7_cRei
2	6087571	6087572	CC-2931	L14	Insertion Mobile	CryptonF-1_cRei
2	6499499	6505640	CC-2931	L15	Expansion		satellite (manual)
2	7024493	7024493	CC-2931	L1	Insertion Mobile	Chlamys-N4_cRei
2	7396747	7396747	CC-2931	L1	Expansion		satellite (TRF)
2	7447538	7447539	CC-2931	L14	Insertion Mobile	CryptonF-1_cRei
2	7522319	7522396	CC-2931	L1	Deletion
2	7612302	7613203	CC-2931	L6	Expansion		satellite (MSAT-4B_CR)
2	7621769	7621776	CC-2931	L13	Insertion Mobile	CryptonF-1_cRei
2	7776731	7776733	CC-2931	L1	Insertion Mobile	MSAT-11_cRei
2	7827607	7827607	CC-2931	L6	Expansion		satellite (TRF)
2	7844118	7844120	CC-2931	L13	Insertion Mobile	CryptonF-1_cRei
2	7871716	7871726	CC-2931	L6	Insertion Mobile	CryptonF-1_cRei
2	8100200	8100202	CC-2931	L6	Insertion Mobile	CryptonF-2_cRei
2	8160481	8160489	CC-2931	L15	Insertion Mobile	unknown-3_cRei
2	8262974	8262989	CC-2931	L1	Insertion Mobile	Chlamys-N4_cRei
2	8522164	8592543	CC-2931	L15	Duplication
2	8669528	8669528	CC-2931	L13	Expansion		satellite (TRF)
2	8675958	8675959	CC-2931	L6	Expansion		satellite (TRF)
2	8738185	8742238	CC-2931	L2	Duplication
3	108874	185374	CC-2931	L2	Duplication
3	129887	129889	CC-2931	L1	Insertion Mobile	CryptonF-1_cRei
3	227504	227725	CC-2931	L2	Deletion
3	269238	270621	CC-2931	L9	Deletion
3	1224834	1224839	CC-2931	L13	Insertion Mobile	CryptonF-1_cRei
3	1267747	1267876	CC-2931	L14	Contraction		satellite (TRF)
3	1719575	1719577	CC-2931	L1	Insertion Mobile	EnSpm-3_cRei
3	1881111	1881113	CC-2931	L14	Insertion Mobile	unknown-3_cRei
3	3134210	3145562	CC-2931	L11	Excision Mobile	EnSpm-3_cRei
3	3134210	3145562	CC-2931	L14	Excision Mobile	EnSpm-3_cRei
3	3134210	3145562	CC-2931	L2	Excision Mobile	EnSpm-3_cRei
3	3134210	3145562	CC-2931	L9	Excision Mobile	EnSpm-3_cRei
3	3134210	3145563	CC-2931	L6	Excision Mobile	EnSpm-3_cRei
3	3296300	3296301	CC-2931	L9	Expansion		satellite (TRF)
3	3991185	3991480	CC-2931	L1	Insertion Mobile	CryptonF-1_cRei
3	3991185	3991480	CC-2931	L1	Deletion
3	4597741	4602980	CC-2931	L2	Inversion
3	4597744	4600689	CC-2931	L2	Deletion
3	4602870	4602979	CC-2931	L2	Deletion
3	5942712	5942713	CC-2931	L13	Insertion Mobile	unknown-3_cRei
3	5942712	chromosome_07:3881579,chromosome_08:3948746	CC-2931	L13	Translocation
3	5983109	chromosome_04:1788682	CC-2931	L15	Translocation
3	6056112	6056117	CC-2931	L14	Insertion Mobile	Chlamys-N4_cRei
3	6151270	6151274	CC-2931	L9	Insertion Mobile	Helitron2-N7_cRei
3	6564255	chromosome_17:6313857	CC-2931	L15	Translocation
3	7056140	7061264	CC-2931	L6	Duplication
4	248461	248463	CC-2931	L13	Insertion Mobile	CryptonF-1_cRei
4	486099	486286	CC-2931	L9	Expansion		satellite (MSAT-4A_CR)
4	584948	584949	CC-2931	L2	Insertion Mobile	CryptonF-1_cRei
4	584948	chromosome_07:2518913	CC-2931	L2	Translocation
4	654393	654393	CC-2931	L13	Expansion		satellite (MSAT-2_CR)
4	686937	687025	CC-2931	L1	Contraction		microsatellite
4	704332	704514	CC-2931	L6	Contraction		satellite (MSAT-2_CR)
4	762214	762215	CC-2931	L15	Expansion		centromeric
4	781031	783097	CC-2931	L2	Expansion		centromeric
4	915330	915331	CC-2931	L15	Expansion		centromeric
4	992903	992957	CC-2931	L14	Contraction		satellite (TRF)
4	1407055	1407073	CC-2931	L11	Insertion Mobile	CryptonF-1_cRei
4	1570884	1570885	CC-2931	L6	Expansion		satellite (manual)
4	2664571	2690166	CC-2931	L6	Duplication
4	2815635	2815640	CC-2931	L13	Insertion Mobile	unknown-3_cRei
4	2827305	2827307	CC-2931	L14	Insertion Mobile	CryptonF-1_cRei
4	3419757	3450682	CC-2931	L13	Duplication
4	3546470	3546476	CC-2931	L14	Insertion Mobile	EnSpm-N3_cRei
4	3556814	3556817	CC-2931	L1	Insertion Mobile	EnSpm-3_cRei
5	5419	7276	CC-2931	L1	Contraction		satellite (TRF)
5	267197	299321	CC-2931	L15	Deletion
5	350129	350286	CC-2931	L2	Duplication
5	651605	651607	CC-2931	L11	Insertion Mobile	EnSpm-3_cRei
5	772643	772661	CC-2931	L6	Contraction		microsatellite
5	865508	865524	CC-2931	L14	Contraction		microsatellite
5	1230195	1241546	CC-2931	L14	Excision Mobile	EnSpm-3_cRei
5	1230196	1241547	CC-2931	L2	Excision Mobile	EnSpm-3_cRei
5	1230196	1241547	CC-2931	L6	Excision Mobile	EnSpm-3_cRei
5	1230196	1241548	CC-2931	L11	Excision Mobile	EnSpm-3_cRei
5	1230196	1241548	CC-2931	L9	Excision Mobile	EnSpm-3_cRei
5	1230427	1230431	CC-2931	L15	Insertion Mobile	unknown-12_cRei
5	1394252	1531316	CC-2931	L14	Inversion
5	1603585	1603588	CC-2931	L11	Insertion Mobile	CryptonF-1_cRei
5	1829977	1829980	CC-2931	L14	Insertion Mobile	unknown-3_cRei
5	1910232	1910409	CC-2931	L11	Duplication
5	2228613	chromosome_13:4700919	CC-2931	L15	Translocation
5	2330630	2330758	CC-2931	L9	Contraction		microsatellite
5	2697078	2697080	CC-2931	L11	Insertion Mobile	unknown-3_cRei
5	2786844	2786846	CC-2931	L2	Insertion Mobile	CryptonF-2_cRei
5	2876632	2876635	CC-2931	L2	Insertion Mobile	unknown-3_cRei
5	3061634	3074783	CC-2931	L2	Duplication
5	3120888	3123572	CC-2931	L13	Duplication
5	3315737	3315738	CC-2931	L2	Insertion Mobile	CryptonF-2_cRei
6	543544	560832	CC-2931	L11	Duplication
6	781075	787857	CC-2931	L1	Duplication
6	823310	823311	CC-2931	L13	Expansion		satellite (manual)
6	972331	972332	CC-2931	L14	Insertion Mobile	CryptonF-1_cRei
6	1020714	1026818	CC-2931	L15	Inversion
6	1779588	1779593	CC-2931	L6	Insertion Mobile	unknown-3_cRei
6	2384024	2444969	CC-2931	L14	Duplication
6	3057783	3058778	CC-2931	L11	Contraction		satellite (TRF)
6	3082142	3082310	CC-2931	L1	Contraction		satellite (TRF)
6	3139536	chromosome_17:944621	CC-2931	L14	Translocation
6	3857106	3862805	CC-2931	L6	Contraction		satellite (MSAT-4B_CR)
6	4166539	4166600	CC-2931	L11	Contraction		microsatellite
6	4284610	4284611	CC-2931	L13	Insertion Mobile	CryptonF-1_cRei
6	4284610	4284611	CC-2931	L13	Insertion Mobile	unknown-3_cRei
6	4284610	chromosome_08:2226531	CC-2931	L13	Translocation
6	4539318	4548777	CC-2931	L2	Duplication
6	4748865	4748868	CC-2931	L13	Insertion Mobile	CryptonF-1_cRei
6	4959414	4959416	CC-2931	L6	Insertion Mobile	CryptonF-1_cRei
6	4970189	4970196	CC-2931	L14	Insertion Mobile	unknown-3_cRei
6	5549277	5554260	CC-2931	L6	Contraction		satellite (manual)
6	5562658	5562660	CC-2931	L2	Insertion Mobile	EnSpm-3_cRei
6	6011313	6011314	CC-2931	L14	Insertion Mobile	CryptonF-1_cRei
6	6011313	6244343	CC-2931	L14	Inversion
6	6033678	6033684	CC-2931	L1	Insertion Mobile	CryptonF-1_cRei
6	6195074	6198035	CC-2931	L13	Duplication
6	6614394	6614394	CC-2931	L2	Expansion		satellite (TRF)
6	6859836	6862393	CC-2931	L13	Expansion		satellite (manual)
6	6986033	6986038	CC-2931	L13	Insertion Mobile	unknown-3_cRei
6	8244474	8244474	CC-2931	L13	Insertion Mobile	Chlamys-N4_cRei
6	10059503	10059519	CC-2931	L9	Insertion Mobile	CryptonF-1_cRei
6	10071230	10099011	CC-2931	L1	Duplication
7	138423	138426	CC-2931	L14	Insertion Mobile	CryptonF-1_cRei
7	933519	933520	CC-2931	L13	Insertion Mobile	MSAT-11_cRei
7	1030043	1030048	CC-2931	L14	Insertion Mobile	unknown-3_cRei
7	1075947	1075952	CC-2931	L13	Insertion Mobile	unknown-3_cRei
7	1076682	1076683	CC-2931	L13	Insertion Mobile	unknown-3_cRei
7	1076682	chromosome_11:2488998	CC-2931	L13	Translocation
7	1207269	1220268	CC-2931	L14	Duplication
7	1232708	1232717	CC-2931	L2	Expansion		satellite (manual)
7	1792548	1792549	CC-2931	L2	Insertion Mobile	Helitron2-7_cRei
7	2518913	2518914	CC-2931	L2	Insertion Mobile	CryptonF-1_cRei
7	2779348	2858819	CC-2931	L15	Duplication
7	3016930	3016931	CC-2931	L2	Expansion		satellite (manual)
7	3027417	3027417	CC-2931	L9	Expansion		satellite (SAT-5_cRei)
7	3391641	3391642	CC-2931	L1	Insertion Mobile	EnSpm-N3_cRei
7	3391641	3391642	CC-2931	L6	Insertion Mobile	EnSpm-N3_cRei
7	3881579	3881580	CC-2931	L13	Insertion Mobile	unknown-3_cRei
7	3881579	chromosome_03:5942712,chromosome_10:4784157	CC-2931	L13	Translocation
7	4152869	4154079	CC-2931	L11	Duplication
7	4154127	4154128	CC-2931	L11	Insertion Mobile	Dualen-4b_cRei
7	4578584	4578587	CC-2931	L9	Insertion Mobile	EnSpm-3_cRei
7	4769448	4769448	CC-2931	L13	Expansion		satellite (TRF)
7	5590891	5590891	CC-2931	L9	Duplication
7	5907460	5907463	CC-2931	L13	Insertion Mobile	unknown-3_cRei
8	2798	2861	CC-2931	L9	Contraction		microsatellite
8	187167	187168	CC-2931	L2	Expansion		satellite (TRF)
8	196138	196139	CC-2931	L1	Expansion		satellite (TRF)
8	196138	196139	CC-2931	L11	Expansion		satellite (TRF)
8	953497	953499	CC-2931	L11	Insertion Mobile	CryptonF-1_cRei
8	1088683	1088686	CC-2931	L6	Insertion Mobile	EnSpm-N3_cRei
8	1215999	1216001	CC-2931	L9	Insertion Mobile	Helitron2-7_cRei
8	1265134	1265135	CC-2931	L14	Expansion		satellite (TRF)
8	1266677	1266679	CC-2931	L1	Expansion		satellite (TRF)
8	1450067	1450067	CC-2931	L9	Expansion		microsatellite
8	1997641	2078894	CC-2931	L14	Duplication
8	2226525	2226526	CC-2931	L13	Insertion Mobile	unknown-3_cRei
8	2752089	2752091	CC-2931	L11	Insertion Mobile	CryptonF-1_cRei
8	3222924	3222930	CC-2931	L11	Insertion Mobile	Copia-N3_cRei
8	3948746	chromosome_03:5942712,chromosome_10:4784157	CC-2931	L13	Translocation
8	4036557	4036559	CC-2931	L9	Insertion Mobile	Helitron2-N7_cRei
8	4263727	4263735	CC-2931	L1	Expansion		5S rRNA array
8	4324324	4324949	CC-2931	L6	Contraction		5S rRNA array
8	4328010	4328010	CC-2931	L15	Expansion		5S rRNA array
8	4382377	4383565	CC-2931	L9	Contraction		microsatellite
9	12825	13062	CC-2931	L11	Contraction		microsatellite
9	12830	12966	CC-2931	L1	Contraction		microsatellite
9	259293	259294	CC-2931	L14	Insertion Mobile	Chlamys-N4_cRei
9	355793	378569	CC-2931	L2	Duplication
9	1323172	1354150	CC-2931	L2	Duplication
9	1595019	1602057	CC-2931	L15	Contraction		satellite (MSAT-4A_CR)
9	3052198	3070204	CC-2931	L13	Duplication
9	3216173	3216180	CC-2931	L11	Insertion Mobile	CryptonF-1_cRei
9	3375285	3375286	CC-2931	L9	Insertion Mobile	Helitron2-7_cRei
9	3873714	3879142	CC-2931	L2	Expansion		satellite (manual)
9	3928021	3929480	CC-2931	L13	Contraction		satellite (TRF)
9	4848449	4855197	CC-2931	L13	Insertion Mobile	unknown-3_cRei
9	4895602	4895606	CC-2931	L13	Insertion Mobile	unknown-12_cRei
9	5050392	5050392	CC-2931	L13	Insertion Mobile	Chlamys-N4_cRei
9	5080304	5080315	CC-2931	L15	Insertion Mobile	unknown-3_cRei
9	5124949	5125105	CC-2931	L15	Contraction		satellite (TRF)
9	5142262	5142268	CC-2931	L14	Insertion Mobile	EnSpm-N3_cRei
9	5205589	5205592	CC-2931	L13	Insertion Mobile	unknown-3_cRei
9	5289208	5289209	CC-2931	L11	Insertion Mobile	CryptonF-1_cRei
9	5289208	chromosome_11:1138886	CC-2931	L11	Translocation
9	5756443	5756444	CC-2931	L13	Insertion Mobile	unknown-3_cRei
9	5756443	chromosome_16:4354796	CC-2931	L13	Translocation
9	5886612	5907316	CC-2931	L2	Duplication
9	5916846	5916846	CC-2931	L14	Insertion Mobile	Chlamys-N4_cRei
9	6281497	6281500	CC-2931	L14	Insertion Mobile	unknown-12_cRei
10	404157	404158	CC-2931	L15	Insertion Mobile	CryptonF-2_cRei
10	404157	404159	CC-2931	L14	Insertion Mobile	CryptonF-1_cRei
10	758023	758024	CC-2931	L14	Expansion		satellite (TRF)
10	2032244	2064014	CC-2931	L11	Duplication
10	2162712	2162714	CC-2931	L15	Insertion Mobile	CryptonF-1_cRei
10	2453631	2453632	CC-2931	L14	Insertion Mobile	CryptonF-1_cRei
10	3551003	3553919	CC-2931	L13	Expansion		satellite (MSAT-4A_CR)
10	3595125	3600371	CC-2931	L11	Excision Mobile	EnSpm-N3_cRei
10	3595125	3600371	CC-2931	L14	Excision Mobile	EnSpm-N3_cRei
10	3601920	3601960	CC-2931	L2	Expansion		centromeric
10	3607802	3607805	CC-2931	L11	Insertion Mobile	EnSpm-N3_cRei
10	3633192	3635337	CC-2931	L14	Contraction		centromeric
10	3654091	3656084	CC-2931	L6	Contraction		satellite (TRF)
10	3852418	3852419	CC-2931	L13	Insertion Mobile	CryptonF-1_cRei
10	4784157	4784158	CC-2931	L13	Insertion Mobile	unknown-3_cRei
10	4784157	chromosome_07:3881579,chromosome_08:3948746	CC-2931	L13	Translocation
10	4784158	4784159	CC-2931	L13	Insertion Mobile	unknown-12_cRei
10	4959518	4959519	CC-2931	L14	Insertion Mobile	CryptonF-1_cRei
10	4959518	9006128	CC-2931	L14	Translocation
10	5320100	5320103	CC-2931	L15	Insertion Mobile	unknown-3_cRei
10	5481130	6291468	CC-2931	L6	Inversion
10	5591899	5591900	CC-2931	L13	Insertion Mobile	CryptonF-1_cRei
10	5647471	5647473	CC-2931	L15	Insertion Mobile	CryptonF-2_cRei
10	5715522	5715523	CC-2931	L13	Insertion Mobile	CryptonF-1_cRei
10	5715522	chromosome_12:5696904	CC-2931	L13	Translocation
10	5819107	5830084	CC-2931	L1	Deletion
10	6752157	6757076	CC-2931	L2	Duplication
10	6996653	6996655	CC-2931	L1	Insertion Mobile	CryptonF-1_cRei
10	7443600	7443608	CC-2931	L15	Insertion Mobile	unknown-3_cRei
10	7765523	7765524	CC-2931	L9	Expansion		satellite (MSAT-4A_CR)
10	7918878	7923936	CC-2931	L15	Deletion
10	8662003	8674745	CC-2931	L2	Duplication
10	9006122	9006123	CC-2931	L14	Insertion Mobile	CryptonF-1_cRei
10	9008142	9008147	CC-2931	L1	Insertion Mobile	unknown-3_cRei
11	150275	151566	CC-2931	L14	Duplication
11	294705	294736	CC-2931	L1	Expansion		satellite (TRF)
11	663811	663818	CC-2931	L9	Insertion Mobile	EnSpm-N3_cRei
11	1138886	1138887	CC-2931	L11	Insertion Mobile	CryptonF-1_cRei
11	1539004	1544636	CC-2931	L1	Duplication
11	1703743	1703744	CC-2931	L15	Insertion Mobile	CryptonF-1_cRei
11	2372080	2376545	CC-2931	L1	Duplication
11	2488998	2488999	CC-2931	L13	Insertion Mobile	unknown-3_cRei
11	2968013	2968106	CC-2931	L9	Contraction		satellite (TRF)
11	2973407	2973414	CC-2931	L13	Insertion Mobile	unknown-3_cRei
11	3689870	3690033	CC-2931	L14	Contraction		satellite (TRF)
11	3689870	3690519	CC-2931	L2	Contraction		satellite (TRF)
11	3689870	3691167	CC-2931	L6	Contraction		satellite (TRF)
11	3765164	3765169	CC-2931	L9	Insertion Mobile	Chlamys-N4_cRei
11	3944712	3944714	CC-2931	L9	Insertion Mobile	unknown-3_cRei
11	4028021	4028100	CC-2931	L13	Contraction		microsatellite
11	4028021	4028127	CC-2931	L11	Contraction		microsatellite
11	4042352	4042352	CC-2931	L14	Expansion		satellite (TRF)
12	403003	410828	CC-2931	L2	Duplication
12	451612	473558	CC-2931	L9	Duplication
12	642115	642173	CC-2931	L6	Contraction		microsatellite
12	707665	707668	CC-2931	L14	Insertion Mobile	CryptonF-1_cRei
12	952879	953247	CC-2931	L13	Contraction		satellite (TRF)
12	1394548	1394549	CC-2931	L13	Insertion Mobile	unknown-12_cRei
12	1516580	1516583	CC-2931	L13	Insertion Mobile	unknown-3_cRei
12	1560723	1560724	CC-2931	L6	Expansion		microsatellite
12	1560723	1560849	CC-2931	L14	Contraction		microsatellite
12	1884089	1884221	CC-2931	L14	Insertion Mobile	CryptonF-1_cRei
12	1884089	1884221	CC-2931	L14	Deletion
12	2502394	2502708	CC-2931	L11	Deletion
12	2502446	2502447	CC-2931	L6	Insertion Mobile	CryptonF-1_cRei
12	3081673	3081677	CC-2931	L1	Insertion Mobile	Chlamys-N4_cRei
12	3358983	3359040	CC-2931	L11	Contraction		microsatellite
12	3442378	3442379	CC-2931	L1	Expansion		satellite (manual)
12	3995642	3995645	CC-2931	L11	Expansion		satellite (MSAT-4B_CR)
12	4001347	4001348	CC-2931	L2	Expansion		satellite (MSAT-4B_CR)
12	4090578	4090579	CC-2931	L9	Insertion Mobile	Helitron2-7_cRei
12	5229569	5229572	CC-2931	L2	Insertion Mobile	CryptonF-2_cRei
12	6667649	6667650	CC-2931	L6	Expansion		centromeric
12	6716752	6716753	CC-2931	L14	Expansion		centromeric
12	6716895	6718976	CC-2931	L2	Contraction		centromeric
12	6755589	6755589	CC-2931	L13	Expansion		satellite (MSAT-5_cRei)
12	7656315	7656414	CC-2931	L9	Contraction		satellite (manual)
12	7656327	7656417	CC-2931	L6	Expansion		satellite (manual)
12	7656367	7656461	CC-2931	L15	Contraction		satellite (manual)
12	7800384	7800502	CC-2931	L2	Contraction		microsatellite
12	7909989	7910070	CC-2931	L2	Contraction		microsatellite
12	8880403	8880404	CC-2931	L9	Insertion Mobile	Helitron2-N7_cRei
12	9273201	9273206	CC-2931	L11	Insertion Mobile	Chlamys-N4_cRei
12	9490730	9511115	CC-2931	L15	Duplication
13	1390140	1395211	CC-2931	L14	Duplication
13	1420798	1421088	CC-2931	L6	Duplication
13	1580392	1580399	CC-2931	L2	Insertion Mobile	CryptonF-1_cRei
13	2060223	2060224	CC-2931	L15	Expansion		satellite (MSAT-4A_CR)
13	2060223	2060224	CC-2931	L9	Expansion		satellite (MSAT-4A_CR)
13	2077596	2077652	CC-2931	L9	Contraction		microsatellite
13	2349840	2351787	CC-2931	L2	Contraction		satellite (TRF)
13	2860299	2860311	CC-2931	L14	Insertion Mobile	unknown-3_cRei
13	2884307	2884313	CC-2931	L13	Insertion Mobile	CryptonF-1_cRei
13	3477991	3477993	CC-2931	L13	Insertion Mobile	CryptonF-1_cRei
13	3617937	3618057	CC-2931	L11	Contraction		satellite (MSAT-1D_CR)
13	3618994	3619083	CC-2931	L9	Contraction		satellite (MSAT-1D_CR)
13	3623726	3623846	CC-2931	L6	Expansion		satellite (MSAT-1D_CR)
13	3796166	3796168	CC-2931	L6	Insertion Mobile	CryptonF-1_cRei
13	4275620	4275621	CC-2931	L2	Expansion		centromeric
13	4707643	4707644	CC-2931	L1	Insertion Mobile	MSAT-11_cRei
14	1	163070	CC-2931	L1	Deletion
14	163007	163124	CC-2931	L13	Contraction		microsatellite
14	621503	621508	CC-2931	L9	Insertion Mobile	Helitron2-7_cRei
14	695124	695128	CC-2931	L11	Expansion		satellite (TRF)
14	698167	698420	CC-2931	L15	Contraction		satellite (TRF)
14	706146	706227	CC-2931	L9	Contraction		satellite (TRF)
14	1036999	1037002	CC-2931	L15	Insertion Mobile	CryptonF-1_cRei
14	1326925	1326925	CC-2931	L1	Expansion		satellite (TRF)
14	1675600	1675601	CC-2931	L9	Insertion Mobile	unknown-3_cRei
14	1675600	chromosome_17:637502	CC-2931	L9	Translocation
14	1784213	1784483	CC-2931	L13	Contraction		microsatellite
14	2850368	2850369	CC-2931	L6	Insertion Mobile	CryptonF-1_cRei
14	2971571	2971626	CC-2931	L13	Contraction		microsatellite
14	2971602	2971704	CC-2931	L9	Contraction		microsatellite
15	78407	93154	CC-2931	L15	Deletion		NCL gene family
15	138947	138948	CC-2931	L6	Insertion Mobile	CryptonF-1_cRei
15	467568	467754	CC-2931	L1	Contraction		microsatellite
15	669992	670064	CC-2931	L6	Contraction		microsatellite
15	750719	750722	CC-2931	L14	Insertion Mobile	Chlamys-N4_cRei
15	851208	851209	CC-2931	L15	Expansion		satellite (TRF)
15	851208	852003	CC-2931	L13	Contraction		satellite (TRF)
15	862759	862760	CC-2931	L13	Expansion		microsatellite
15	919043	919047	CC-2931	L6	Insertion Mobile	CryptonF-1_cRei
15	936699	936700	CC-2931	L15	Insertion Mobile	Helitron2-7_cRei
15	971468	971519	CC-2931	L15	Contraction		microsatellite
15	985511	985515	CC-2931	L13	Insertion Mobile	unknown-3_cRei
15	1155071	1157748	CC-2931	L14	Expansion		satellite (manual)
15	1371891	1371932	CC-2931	L15	Contraction		NCL gene family
15	2049202	2049207	CC-2931	L14	Insertion Mobile	unknown-3_cRei
15	2898489	2906095	CC-2931	L13	Duplication
15	2924211	2939343	CC-2931	L2	Duplication
15	3396330	3401866	CC-2931	L9	Expansion		centromeric
15	3461447	3461453	CC-2931	L2	Insertion Mobile	EnSpm-N3_cRei
15	3469498	3469654	CC-2931	L15	Contraction		microsatellite
15	3606747	3606747	CC-2931	L11	Expansion		satellite (TRF)
15	3629123	3629124	CC-2931	L6	Contraction		satellite (TRF)
15	3633688	3633880	CC-2931	L9	Contraction		satellite (TRF)
15	3634038	3634040	CC-2931	L11	Insertion Mobile	EnSpm-N3_cRei
15	3799514	3799515	CC-2931	L2	Expansion		microsatellite
15	3799514	3799515	CC-2931	L9	Expansion		microsatellite
15	3799629	3799779	CC-2931	L1	Contraction		microsatellite
15	3799655	3799779	CC-2931	L14	Contraction		microsatellite
15	3799655	3799820	CC-2931	L13	Contraction		microsatellite
15	3799722	3799779	CC-2931	L15	Contraction		microsatellite
15	3944863	3944865	CC-2931	L2	Inversion
15	3952765	3953075	CC-2931	L11	Contraction		satellite (TRF)
15	4203622	4203623	CC-2931	L9	Insertion Mobile	Helitron2-N7_cRei
15	4491049	4501788	CC-2931	L1	Duplication
16	850339	850343	CC-2931	L1	Insertion Mobile	unknown-3_cRei
16	1163121	1164871	CC-2931	L6	Deletion
16	1187866	1187868	CC-2931	L6	Insertion Mobile	unknown-3_cRei
16	1529759	1529761	CC-2931	L15	Insertion Mobile	MSAT-11_cRei
16	1879444	1879445	CC-2931	L14	Expansion		satellite (manual)
16	2072054	2072060	CC-2931	L13	Insertion Mobile	unknown-3_cRei
16	2756158	2756165	CC-2931	L13	Insertion Mobile	Chlamys-9_cRei
16	2952789	2952980	CC-2931	L14	Expansion		satellite (TRF)
16	3093506	3915599	CC-2931	L2	Inversion
16	3469281	3469284	CC-2931	L13	Insertion Mobile	EnSpm-N3_cRei
16	3475741	3475744	CC-2931	L13	Insertion Mobile	unknown-3_cRei
16	3494132	3505393	CC-2931	L13	Excision Mobile	EnSpm-3_cRei
16	3780854	3780855	CC-2931	L6	Expansion		satellite (TRF)
16	3780854	3781230	CC-2931	L9	Contraction		satellite (TRF)
16	3915599	4165002	CC-2931	L13	Inversion
16	3915602	3923750	CC-2931	L1	Excision Mobile	CryptonF-1_cRei
16	3915602	3923750	CC-2931	L2	Excision Mobile	CryptonF-1_cRei
16	3915602	3923750	CC-2931	L6	Excision Mobile	CryptonF-1_cRei
16	3915602	3923750	CC-2931	L14	Excision Mobile	CryptonF-1_cRei
16	3915602	3923750	CC-2931	L15	Excision Mobile	CryptonF-1_cRei
16	3915602	4156843	CC-2931	L6	Inversion
16	3915602	4160328	CC-2931	L1	Inversion
16	3915602	4160328	CC-2931	L9	Inversion
16	3915603	3923745	CC-2931	L11	Excision Mobile	CryptonF-1_cRei
16	3919886	3919886	CC-2931	L1	Expansion		satellite (TRF)
16	3925336	3925336	CC-2931	L1	Expansion		microsatellite
16	4156830	4164991	CC-2931	L15	Excision Mobile	CryptonF-1_cRei
16	4156830	4164991	CC-2931	L13	Excision Mobile	CryptonF-1_cRei
16	4156830	4164991	CC-2931	L14	Excision Mobile	CryptonF-1_cRei
16	4164991	5156122	CC-2931	L14	Inversion
16	4166679	4168070	CC-2931	L14	Duplication
16	4319289	4319289	CC-2931	L6	Expansion		satellite (TRF)
16	4354791	4354791	CC-2931	L13	Insertion Mobile	unknown-3_cRei
16	4375457	4375458	CC-2931	L6	Expansion		satellite (TRF)
16	4375457	4375458	CC-2931	L11	Expansion		satellite (TRF)
16	4375457	4375458	CC-2931	L14	Expansion		satellite (TRF)
16	4385386	4385807	CC-2931	L6	Expansion		microsatellite
16	4605572	4605574	CC-2931	L2	Insertion Mobile	EnSpm-3_cRei
16	5187039	5187151	CC-2931	L14	Contraction		microsatellite
16	5367875	5367885	CC-2931	L2	Insertion Mobile	unknown-3_cRei
16	5404797	5404804	CC-2931	L11	Insertion Mobile	CryptonF-1_cRei
16	5631094	5652288	CC-2931	L2	Deletion
16	5794679	5794680	CC-2931	L9	Expansion		microsatellite
16	5794679	5794766	CC-2931	L14	Contraction		microsatellite
16	6171536	6171548	CC-2931	L13	Insertion Mobile	CryptonF-1_cRei
16	6212142	6212143	CC-2931	L15	Insertion Mobile	Helitron2-7_cRei
16	6225178	6225179	CC-2931	L15	Expansion		satellite (TRF)
16	6506755	6507129	CC-2931	L6	Expansion		microsatellite
16	7513695	7513696	CC-2931	L6	Expansion		microsatellite
16	7924811	7959009	CC-2931	L9	Duplication
17	578095	578095	CC-2931	L14	Insertion Mobile	Chlamys-9_cRei
17	633781	633830	CC-2931	L9	Contraction		microsatellite
17	637488	637489	CC-2931	L9	Insertion Mobile	unknown-3_cRei
17	869258	869259	CC-2931	L2	Insertion Mobile	CryptonF-1_cRei
17	1295459	1295463	CC-2931	L13	Insertion Mobile	EnSpm-N3_cRei
17	2033173	2033174	CC-2931	L14	Insertion Mobile	EnSpm-N3_cRei
17	3004912	3004914	CC-2931	L2	Insertion Mobile	unknown-3_cRei
17	4377448	4377546	CC-2931	L11	Contraction		microsatellite
17	4489535	4489538	CC-2931	L13	Insertion Mobile	CryptonF-1_cRei
17	4768702	4768702	CC-2931	L1	Expansion		satellite (TRF)
17	5469033	5469034	CC-2931	L1	Expansion		microsatellite
17	5658667	5658796	CC-2931	L11	Expansion		satellite (TRF)
17	5972335	5978601	CC-2931	L13	Excision Mobile	EnSpm-N3_cRei
17	5976358	5976443	CC-2931	L9	Contraction		satellite (TRF)
17	6284695	6284908	CC-2931	L9	Expansion		microsatellite
