# Supplementary material for: Rates and spectra of de novo structural mutations in Chlamydomonas reinhardtii
Source: HighWire-hosted journal article supplement (doi:10.1101/gr.276957.122), 2022-12-12
Supplement: Supplemental_Dataset_S2.xlsx [file Supplemental_Dataset_S2.xlsx]

## Sheet: S2.1 CC-2931 assembly gaps
Supplemental Dataset S2.1. CC-2931 ancestor assembly gaps and manual annotation of their genomic context.
chromosome	start	end	annotation
chromosome 01	1114105	1124105	centromere
chromosome 02	862452	862552	major tandem repeat >150 kb
chromosome 02	2867096	2877096	centromere
chromosome 03	1346209	1346309	major tandem repeat >50 kb
chromosome 03	6794161	6804161	centromere
chromosome 05	1720680	1730680	centromere
chromosome 06	2288012	2288112	major tandem repeat >50 kb
chromosome 06	6541417	6551417	centromere
chromosome 07	1963585	1973585	microsatellite-rich
chromosome 09	6045758	6045858	major tandem repeat >50 kb
chromosome 11	2757146	2767146	centromere
chromosome 13	497328	507328	major tandem repeat >25 kb
chromosome 13	1902558	1902658	major tandem repeat >45 kb
chromosome 13	4294832	4304832	centromere
chromosome 14	719638	719738	major satellite >75 kb
chromosome 14	2245663	2255663	centromere
chromosome 15	209515	219515	major satellite >100 kb
chromosome 15	2352966	2362966	major satellite >50 kb
chromosome 15	3441237	3451237	microsatellite/satellite-rich
chromosome 16	3660889	3670889	centromere
chromosome 16	5887193	5897193	major satellite >20 kb
chromosome 17	93602	103602	major tandem repeat >40 kb

## Sheet: S2.2 CC-2931 uncallable regions
Supplemental Dataset S2.2. CC-2931 uncallable regions >20 kb and manual annotation of their genomic context.
chromosome	start	end	length	annotation
chromosome_01	567735	590533	22798	microsatellite-rich
chromosome_01	1073708	1146795	73087	centromere
chromosome_02	770977	862552	91575	major tandem repeat >150 kb, flanks assembly gap
chromosome_02	2711618	2736168	24550	centromere
chromosome_02	3431317	3461838	30521	microsatellite-rich
chromosome_02	8882514	8908603	26089	subtelomere
chromosome_03	2282657	2311692	29035	major satellite >40 kb
chromosome_03	6779711	6836990	57279	centromere
chromosome_03	8850391	8871508	21117	subtelomere
chromosome_05	2122163	2157118	34955	major satellite >35 kb
chromosome_05	3157400	3192041	34641	microsatellite-rich
chromosome_05	3479043	3501881	22838	subtelomere
chromosome_06	6533829	6569797	35968	centromere
chromosome_06	9205667	9236589	30922	major satellite >30 kb
chromosome_06	10173538	10194524	20986	transposon-rich
chromosome_07	1951515	1986563	35048	microsatellite-rich, flanks assembly gap
chromosome_08	2685156	2709399	24243	centromere
chromosome_10	7949321	7972240	22919	major satellite >40 kb
chromosome_10	8228727	8250487	21760	major satellite >35 kb
chromosome_11	2757146	2855884	98738	Major satellite and transposon-rich sequence flanking centromere
chromosome_11	3114645	3135104	20459	microsatellite-rich
chromosome_12	0	20476	20476	subtelomere
chromosome_13	0	49490	49490	subtelomere
chromosome_13	1907293	1948443	41150	segmental duplication
chromosome_13	4288749	4316290	27541	centromere
chromosome_14	0	42635	42635	subtelomere
chromosome_14	719638	754929	35291	major satellite >75 kb, flanks assembly gap
chromosome_14	2224356	2264536	40180	centromere
chromosome_14	4230075	4254214	24139	ribosomal DNA
chromosome_15	209489	292719	83230	major satellite >100 kb, flanks assembly gap
chromosome_15	332953	390306	57353	microsatellite-rich, upstream of large satellite
chromosome_15	2810780	2864824	54044	transposon-rich
chromosome_15	2352966	2404308	51342	major satellite >50 kb, flanks assembly gap
chromosome_15	3077803	3373466	295663	Major transposon-rich region flanking centromere
chromosome_15	4496296	4519138	22842	subtelomere
chromosome_16	3588589	3728955	140366	centromere
chromosome_17	93602	113717	20115	major tandem repeat >40 kb, flanks assembly gap

## Sheet: S2.3 CC-1952 assembly gaps
Supplemental Dataset S2.3. CC-1952 ancestor assembly gaps and manual annotation of their genomic context.
chromosome	start	end	annotation
chromosome_01	636258	646258	microsatellite-rich
chromosome_01	1832225	1842225	microsatellite-rich
chromosome_01	7322565	7332565	major satellite >50 kb
chromosome_02	3273689	3283689	microsatellite-rich
chromosome_05	447414	457414	low coverage
chromosome_05	1851126	1861126	satellite >15 kb
chromosome_06	6318090	6328090	microsatellite-rich
chromosome_06	6977717	6987717	microsatellite-rich
chromosome_08	3147705	3157705	low coverage
chromosome_09	2533244	2543244	microsatellite-rich
chromosome_09	4931324	4941324	microsatellite-rich
chromosome_12	1897628	1907628	major satellite >50 kb
chromosome_12	6479458	6489458	major microsatellite >20 kb
chromosome_13	1894182	1904182	major tandem repeat >90 kb
chromosome_14	281723	291723	microsatellite-rich
chromosome_14	3970777	3980777	microsatellite-rich
chromosome_15	1967869	1977869	microsatellite-rich
chromosome_15	3532212	3542212	major satellite >40 kb
chromosome_16	869410	879410	microsatellite-rich
chromosome_16	2495264	2505264	microsatellite-rich
chromosome_16	6313874	6323874	major satellite >75 kb
chromosome_17	2795300	2805300	microsatellite-rich

## Sheet: S2.4 CC-1952 uncallable regions
Supplemental Dataset S2.4. CC-1952 uncallable regions >20 kb and manual annotation of their genomic context.
chromosome	start	end	length	annotation
chromosome_01	0	64281	64281	ribosomal DNA
chromosome_01	6609838	6647602	37764	major satellite >50 kb
chromosome_01	7289997	7352338	62341	major satellite >50 kb, flanks assembly gap
chromosome_02	0	40144	40144	subtelomere
chromosome_02	3769026	3791386	22360	segmental duplication
chromosome_03	6726253	6795655	69402	centromere
chromosome_05	3852890	3900383	47493	subtelomere
chromosome_06	690288	722745	32457	major satellite >30 kb
chromosome_08	0	25854	25854	subtelomere
chromosome_08	2709717	2836018	126301	centromere
chromosome_08	3147254	3192814	45560	satellite + low coverage region
chromosome_08	4709953	4771518	61565	ribosomal DNA
chromosome_11	1750637	1789204	38567	major satellite >50 kb
chromosome_11	2690076	2710116	20040	major satellite >40 kb
chromosome_11	3623395	3652270	28875	transposon rich
chromosome_11	5016866	5111819	94953	subtelomere
chromosome_12	1875600	1911129	35529	major satellite >50 kb, flanks assembly gap
chromosome_12	4173066	4206454	33388	segmental duplication
chromosome_12	6474273	6496860	22587	major microsatellite >20 kb, flanks assembly gap
chromosome_13	1849281	1928860	79579	major tandem repeat >90 kb, flanks assembly gap
chromosome_14	694821	725350	30529	major satellite >40 kb
chromosome_14	4208487	4358899	150412	ribosomal DNA
chromosome_15	1966836	1990884	24048	microsatellite-rich, flanks assembly gap
chromosome_16	0	41598	41598	subtelomere
chromosome_16	869410	893409	23999	microsatellite-rich, flanks assembly gap
chromosome_16	6279211	6332851	53640	major satellite >75 kb, flanks assembly gap
chromosome_17	0	34996	34996	subtelomere
